# Supplementary material for: Literature-Based Discovery of IFN-γand Vaccine-Mediated Gene Interaction Networks
Source: Hindawi journal article supplement (doi:10.1155/2010/426479), 2010-01-01
Supplement: f1 [file 426479.f1.pdf]

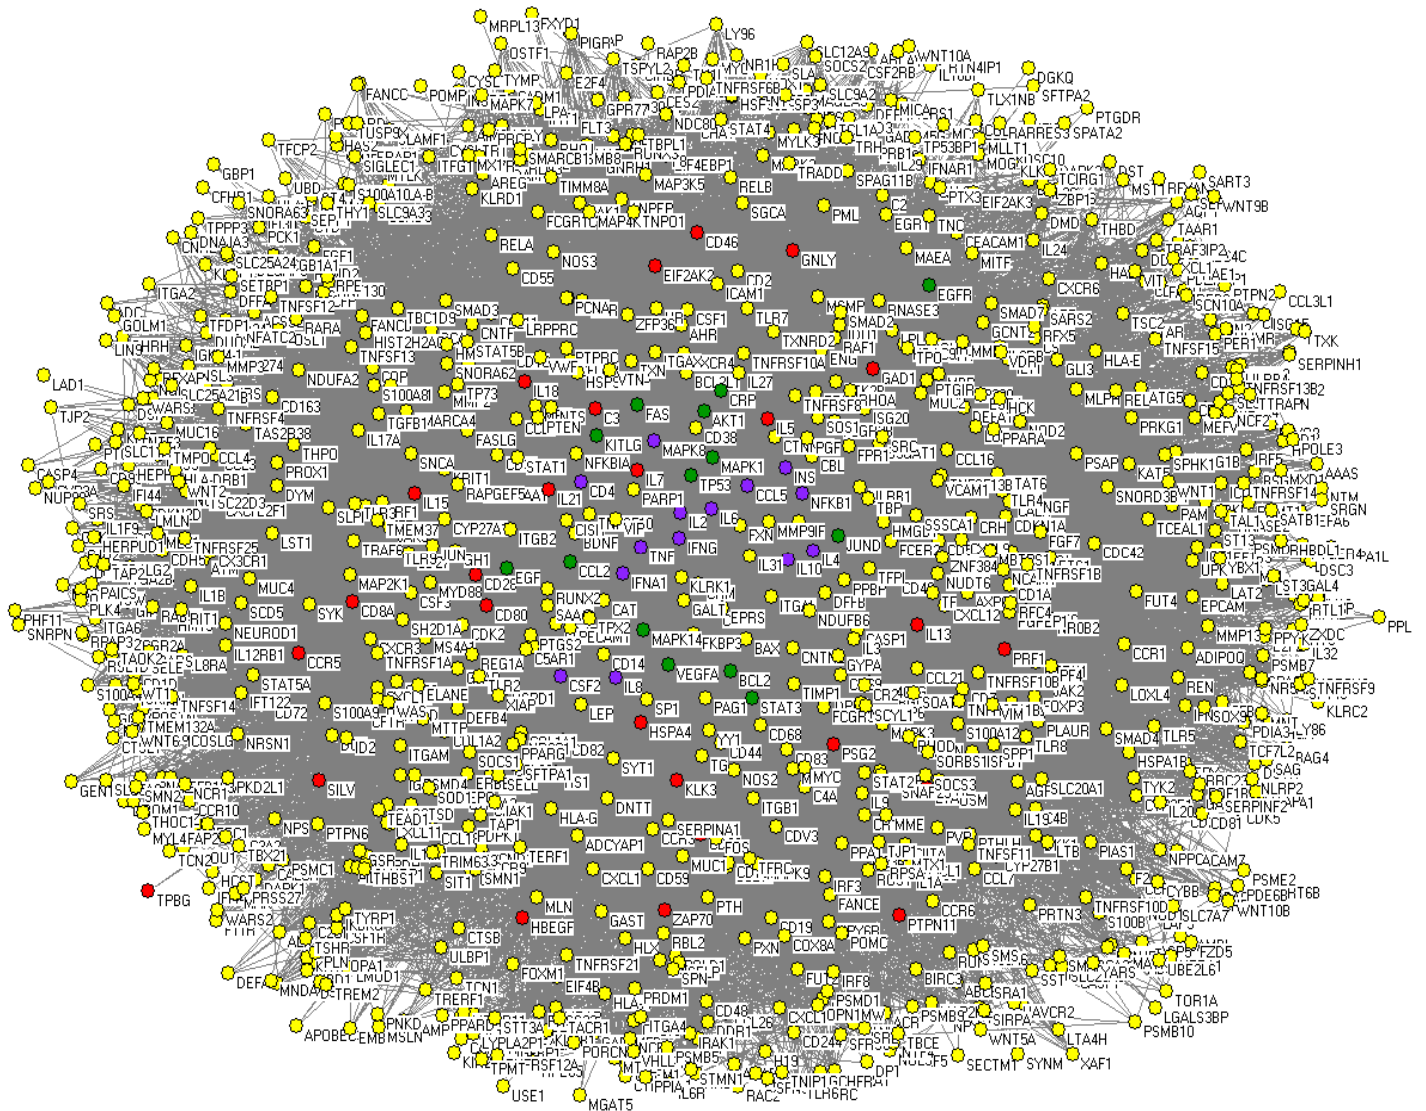

**Supplemental Fig. 1.** The graph of the generic IFNG network extracted from the literature. The network consists of 1060 nodes (genes) and 26,313 edges (interactions). The purple nodes are the genes that are central in both the generic and the IFNG-vaccine networks. The green nodes are the genes that are central in only the generic IFNG network and the red nodes are the genes that are central in only the IFNG-vaccine network. The rest of the nodes are shown in yellow.
